# Supplementary material
Source: PubMed Central journal article supplement (PMC3046571)
Supplement: pp.110.170134_1.pdf [file pp.110.170134_1.pdf]

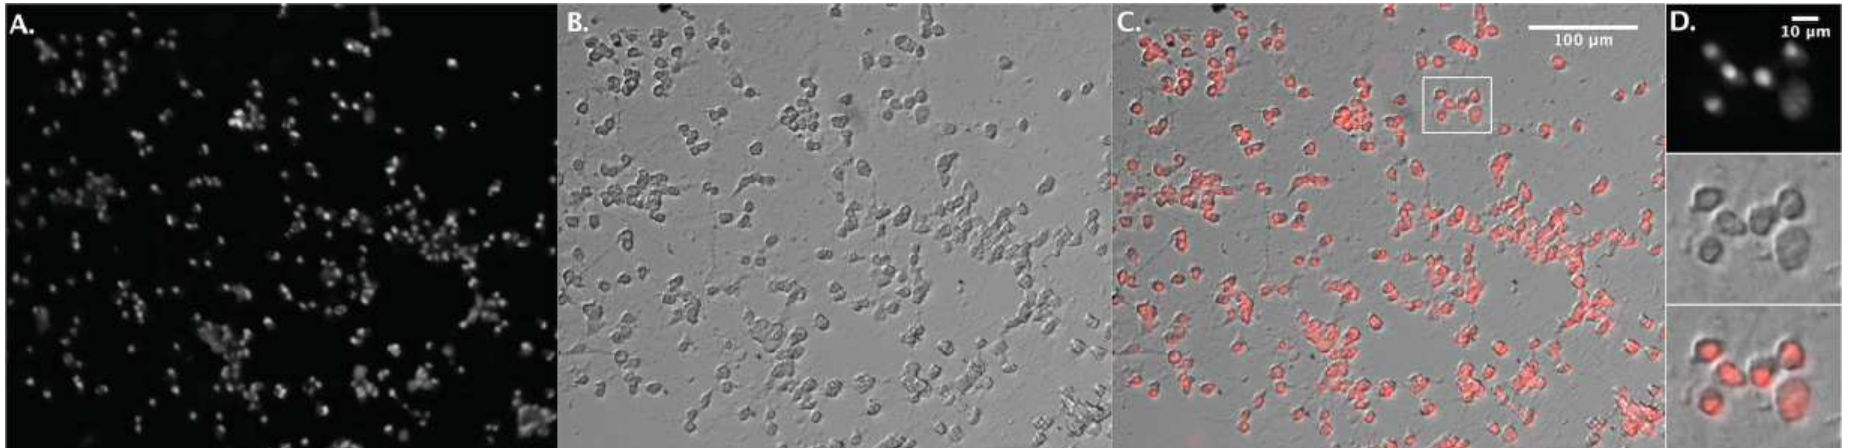

**Supplemental Figure 1.** Fields of tobacco nuclei (purified according to protocol 2) stained with propidium iodide (A) and visualized with differential interference contrast (B). Panel C shows an overlay of the two channels. The inset in D shows a detailed view of the rectangular selection in C.
