# Supplementary material
Source: PubMed Central journal article supplement (PMC3046571)
Supplement: pp.110.170134_2.pdf [file pp.110.170134_2.pdf]

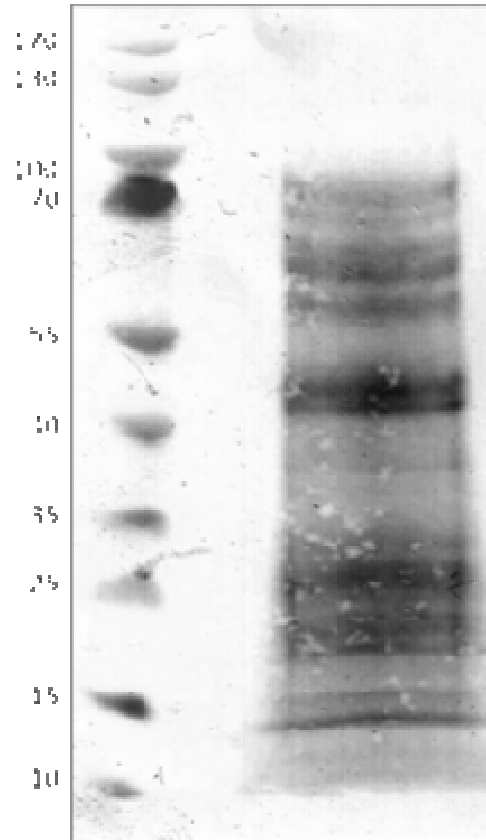

**Supplemental Figure 2.** SDS-PAGE analysis of nuclear proteins purified from *Nicotiana tabacum* cv Xanthi cells according to protocol 1, and retained on a Nictaba-Sepharose affinity column. A molecular mass marker (kDa) is shown on the left.
